# Supplementary material for: Microcystin-LR Removal from Water via Enzymatic Linearization and Ultrafiltration
Source: MDPI journal article supplement (doi:10.3390/toxins14040231), 2022-03-22
Supplement: s1 [file s1]

## Microcystin-LR Removal from Water via Enzymatic Linearization and Ultrafiltration

Abelline Fionah, Cannon Hackett, Hazim Aljewari, Laura Brady, Faisal Alqhtani, Isabel C. Escobar and Audie K. Thompson

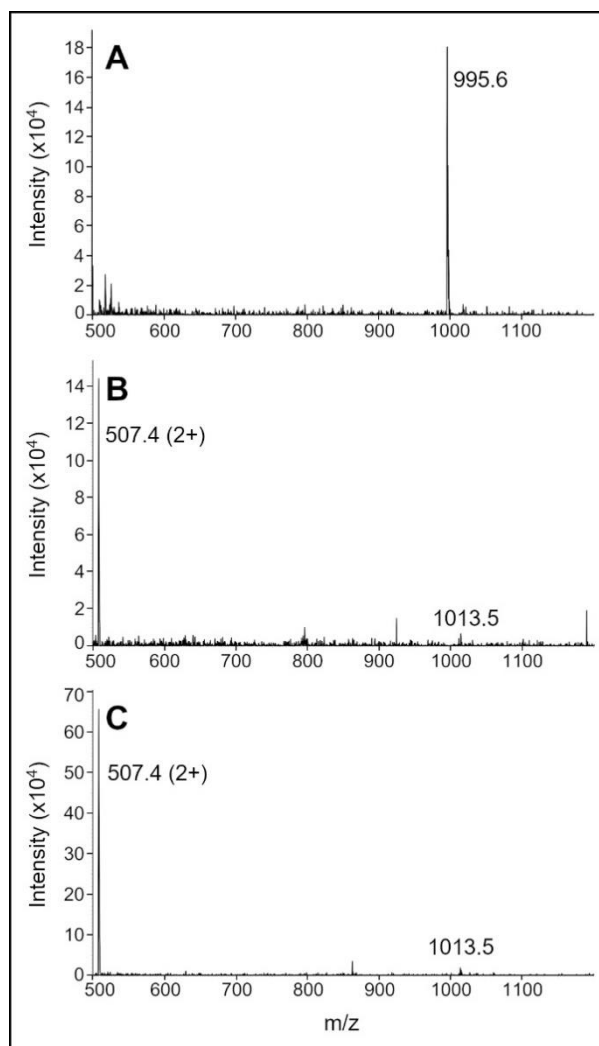

**Figure S1.** Mass spectrums of MC-LR solution as it is degraded by MlrA in an environment of phosphate buffer (5 mM), for samples taken 0 hours (5.03 min peak) (A), 4 hours (5.17 min peak) (B), and 24 hours (5.19 min peak) (C).

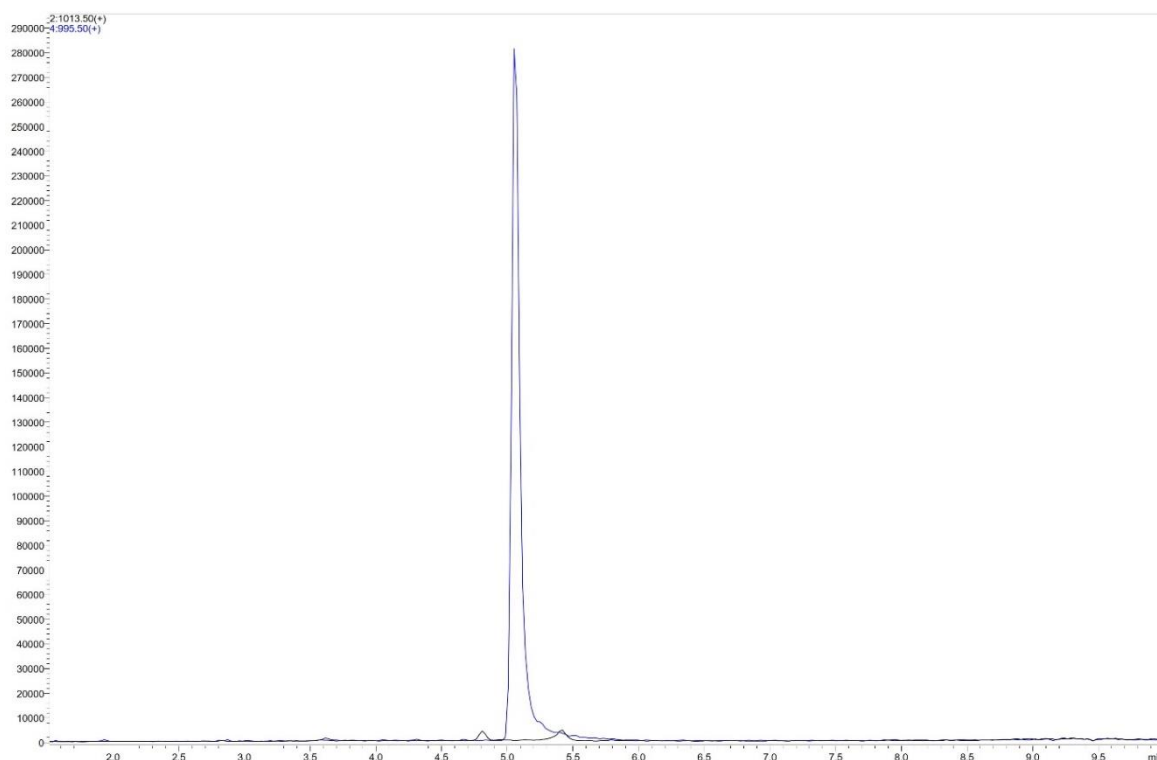

**Figure S2.** LC-MS SIM chromatogram for MC-LR as it is linearized by MlrA in an environment of phosphate buffer (5 mM), for the sample taken 0 hours after initial mixing (associated with Figure 2A). The curve for cyclic MC-LR (at  $m/z = 995.5$ ) is shown in blue and the curve for linear MC-LR ( $m/z = 1013.5$ ) is shown in black.

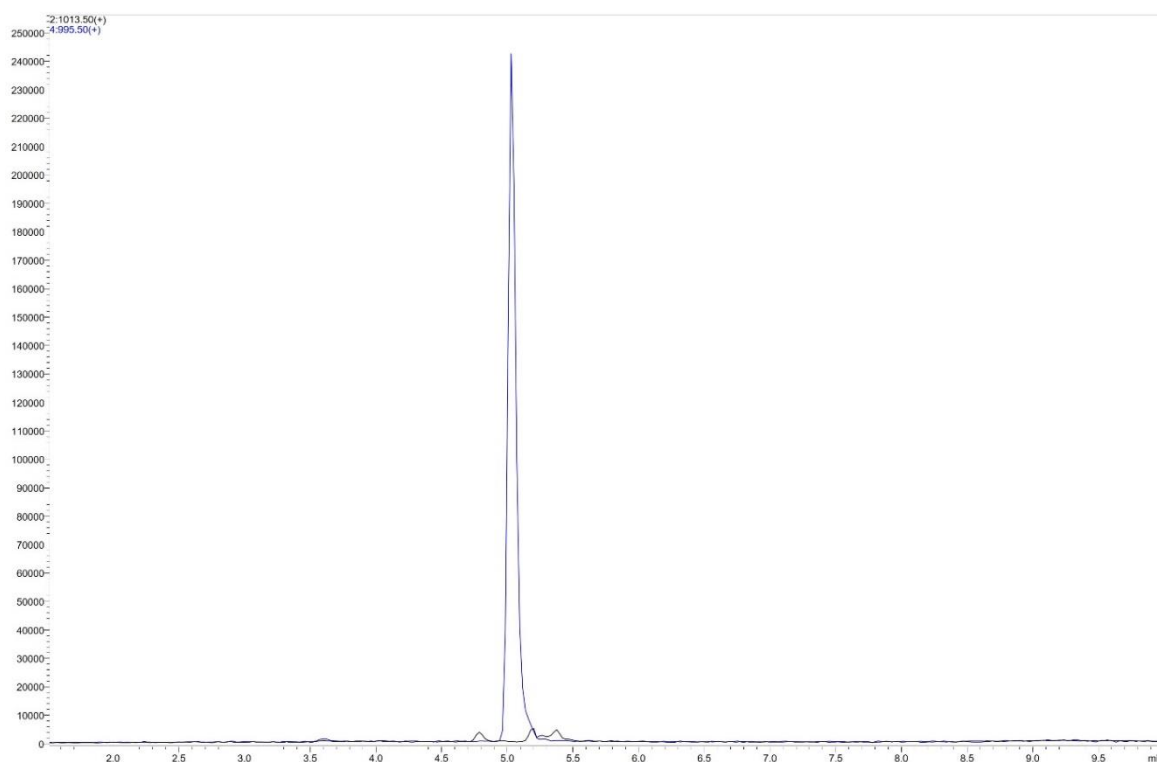

**Figure S3.** LC-MS SIM chromatogram for MC-LR as it is linearized by MlrA in an environment of phosphate buffer (5 mM), for the sample taken 4 hours after initial mixing (associated with Figure 2B). The curve for cyclic MC-LR (at  $m/z = 995.5$ ) is shown in blue and the curve for linear MC-LR ( $m/z = 1013.5$ ) is shown in black.

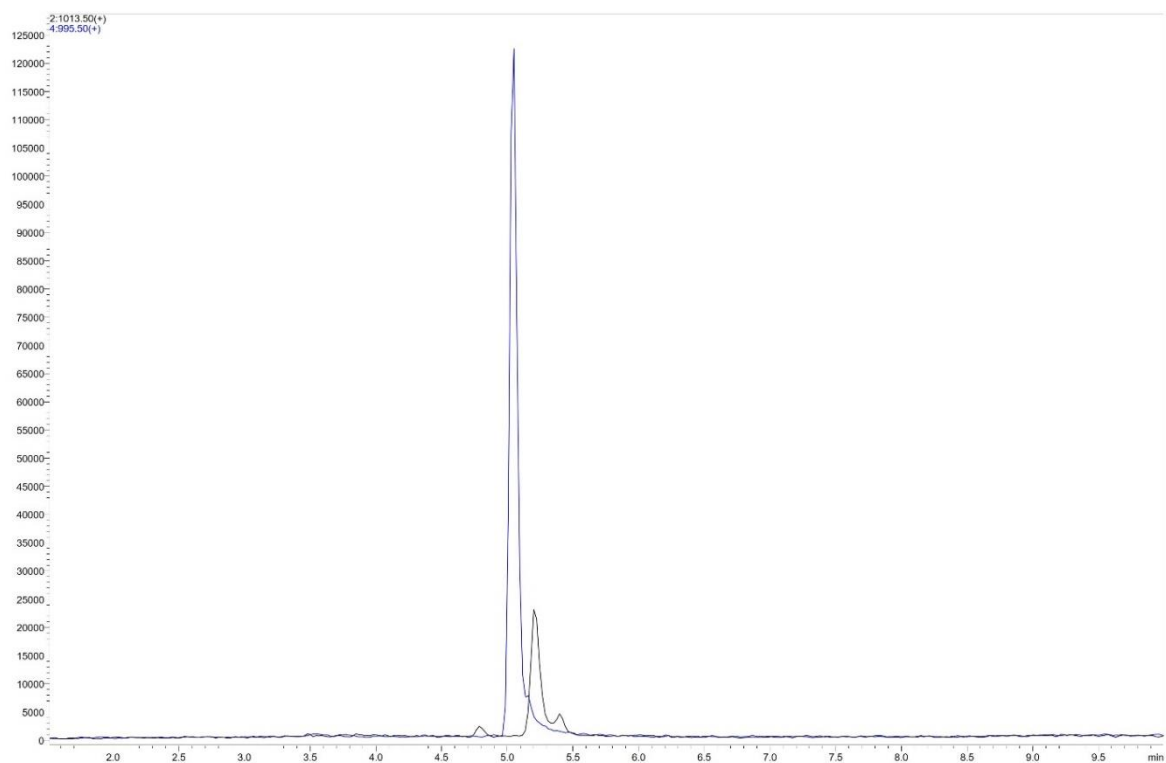

**Figure S4.** LC-MS SIM chromatogram for MC-LR as it is linearized by MlrA in an environment of phosphate buffer (5 mM), for the sample taken 24 hours after initial mixing (associated with Figure 2C). The curve for cyclic MC-LR (at  $m/z = 995.5$ ) is shown in blue and the curve for linear MC-LR ( $m/z = 1013.5$ ) is shown in black.

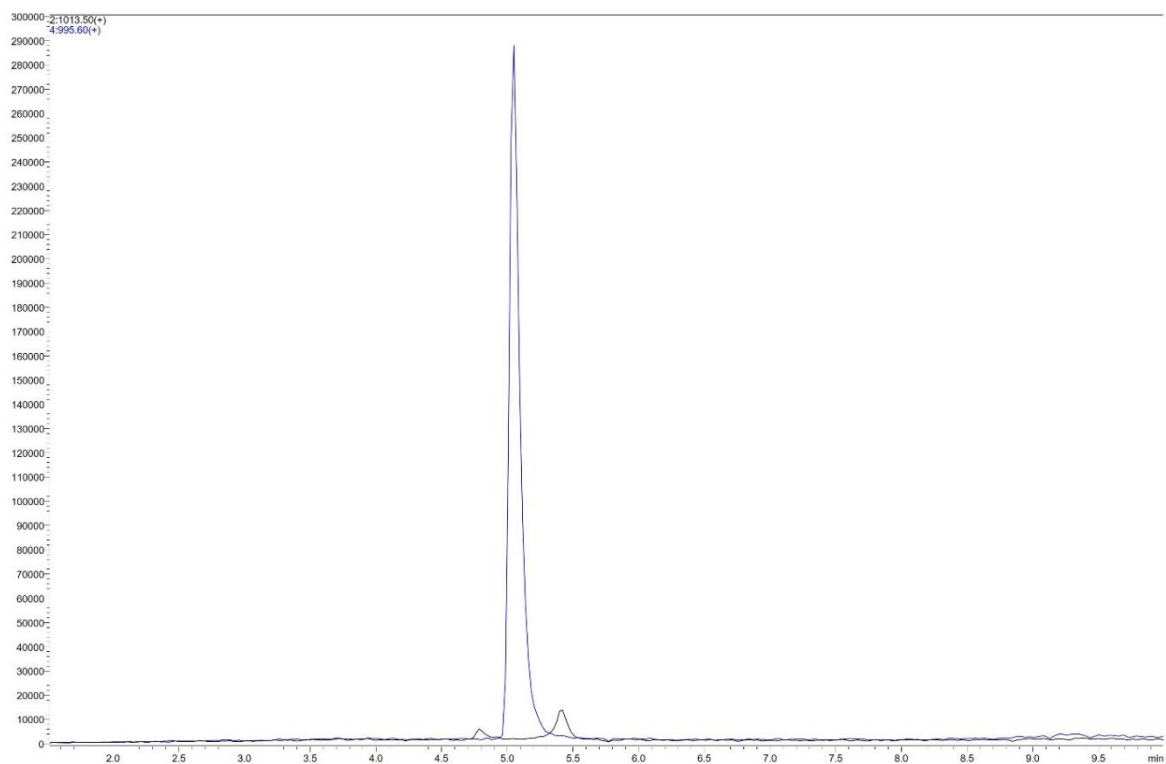

**Figure S5.** LC-MS SIM chromatogram for MC-LR solution incubated with a SPEEK-PSf membrane for the sample taken 0 hours after initial mixing (associated with Figure 5A). The curve for cyclic MC-LR (at  $m/z = 995.6$ ) is shown in blue and the curve for linear MC-LR ( $m/z = 1013.5$ ) is shown in black.

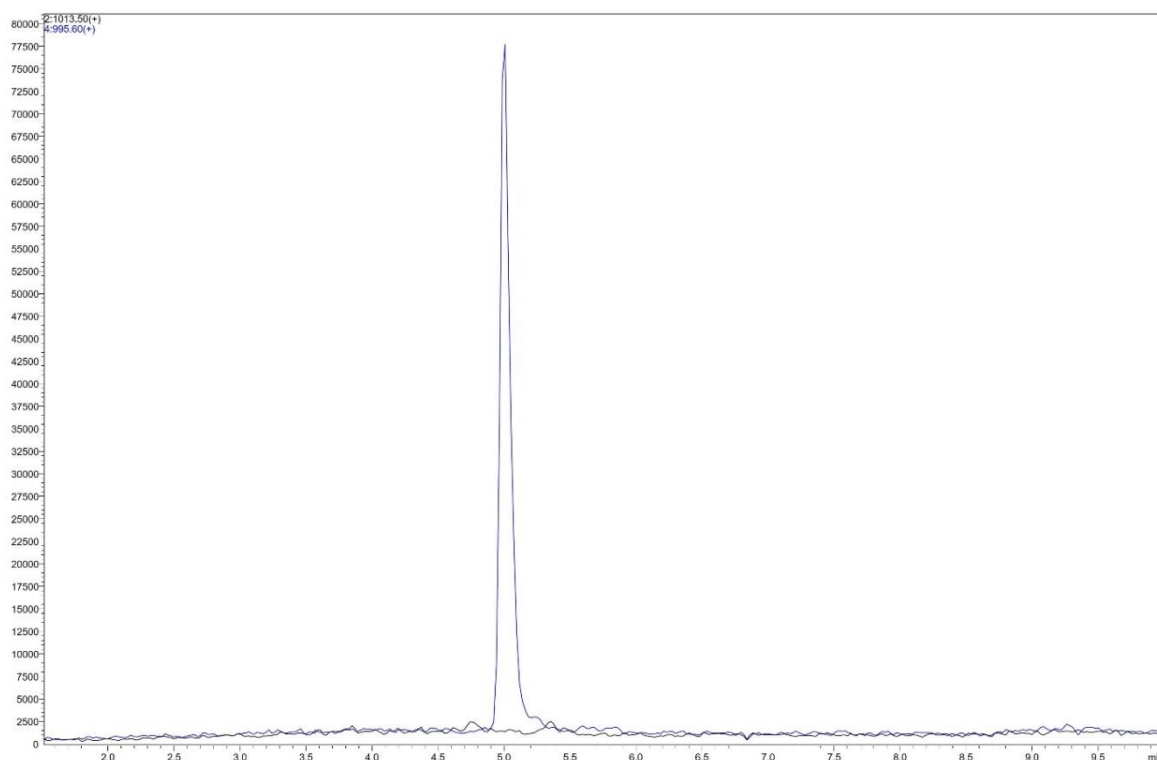

**Figure S6.** LC-MS SIM chromatogram for MC-LR solution incubated with a SPEEK-PSf membrane for the sample taken 4 hours after initial mixing (associated with Figure 5B). The curve for cyclic MC-LR (at  $m/z = 995.6$ ) is shown in blue and the curve for linear MC-LR ( $m/z = 1013.5$ ) is shown in black.

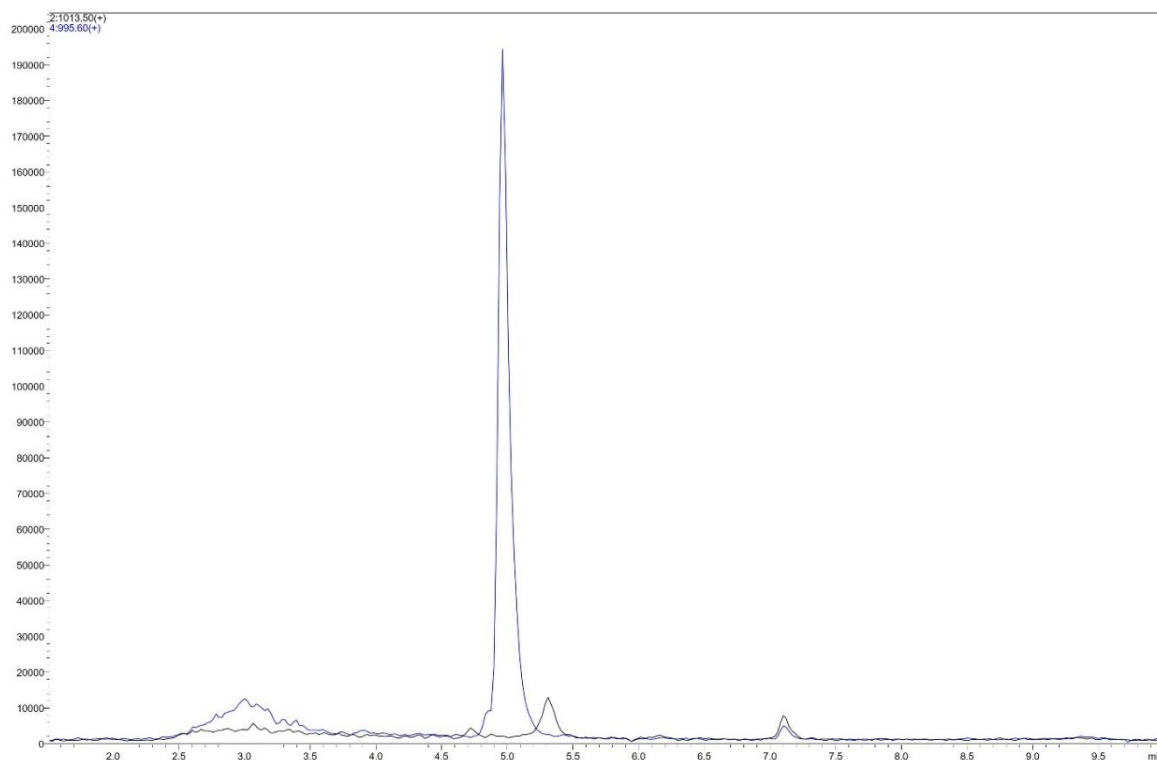

**Figure S7.** LC-MS SIM chromatogram for MC-LR solution incubated with a SPEEK-PSf membrane for the sample taken 24 hours after initial mixing and after adding methanol to cause desorption (associated with Figure 5C). The curve for cyclic MC-LR (at  $m/z = 995.6$ ) is shown in blue and the curve for linear MC-LR ( $m/z = 1013.5$ ) is shown in black.

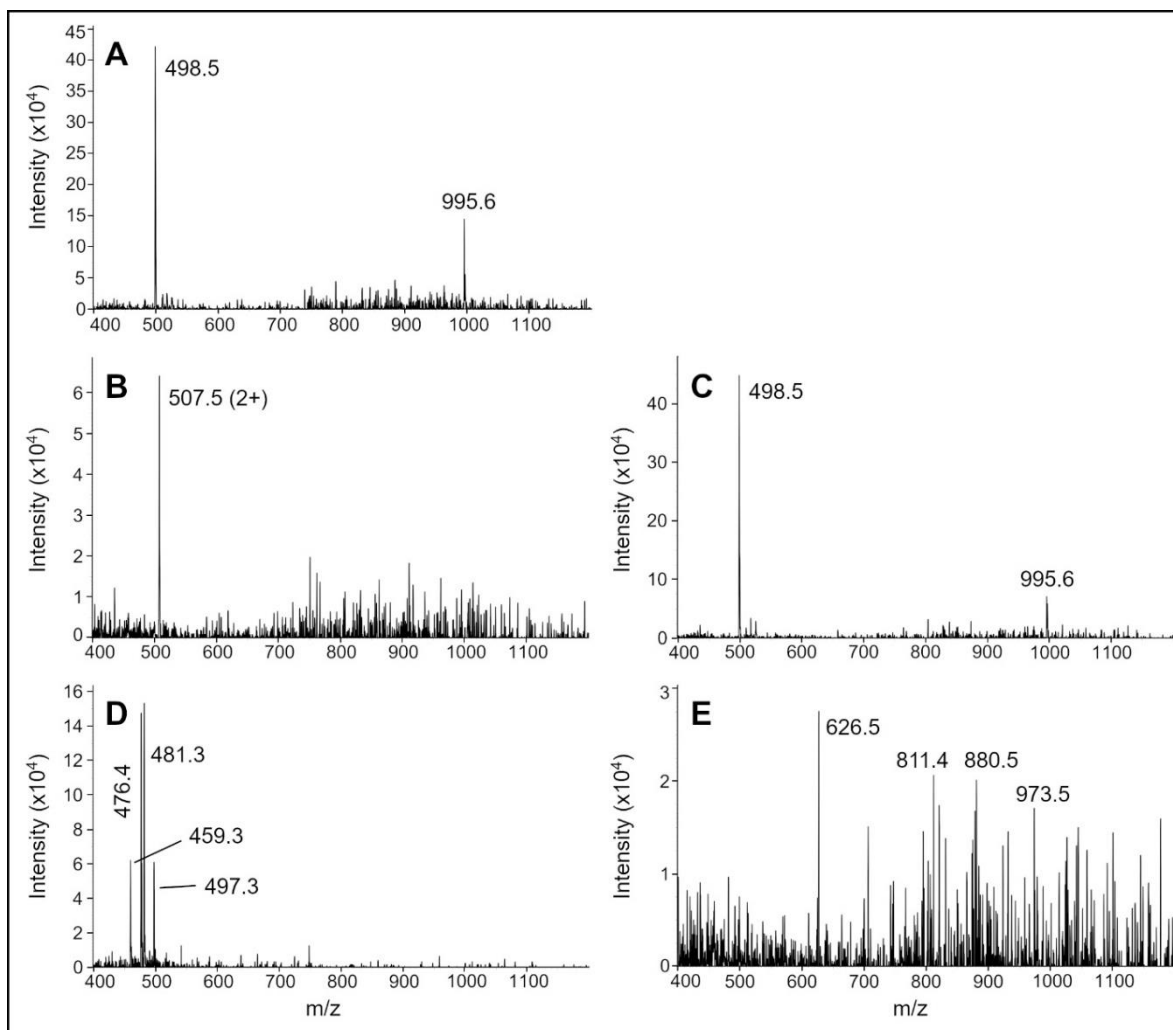

**Figure S8.** Mass spectrums of MC-LR solution incubated with MlrA, for samples taken at 0 hours (4.63 min peak) (A), 24 hours (4.09 min peak) (B), 24 hours (4.63 min peak) (C), and the solution filtered through a SPEEK-PSf membrane for the 1.73 min peak (D) and the 4.65 min peak (E).
